# Supplementary material for: Age-induced excellence with green solvents: the impact of residual solvent and post-treatments in screen-printed carbon perovskite solar cells and modules
Source: Royal Society of Chemistry journal article supplement (doi:10.1039/d4ma00136b), 2024-01-01
Supplement: d4ma00136b1.pdf [file d4ma00136b1.pdf]

### Supplementary Information

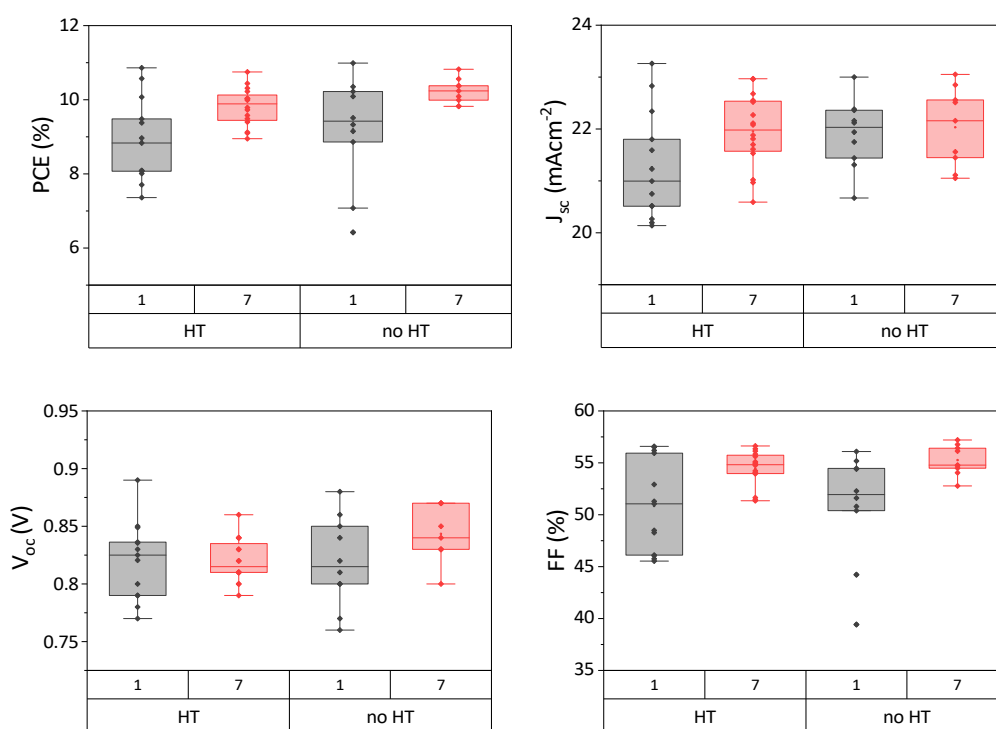

**S 1: PV Data of AVA<sub>0.03</sub>MAPbI<sub>3</sub> devices fabricated from GVL-MeOH precursors before and after humidity treatments (HT) or ambient dry storage. Samples were measured 1 day after fabrication and 7 days after fabrication, with HT on days 2-3. 14-18 samples in each set.**

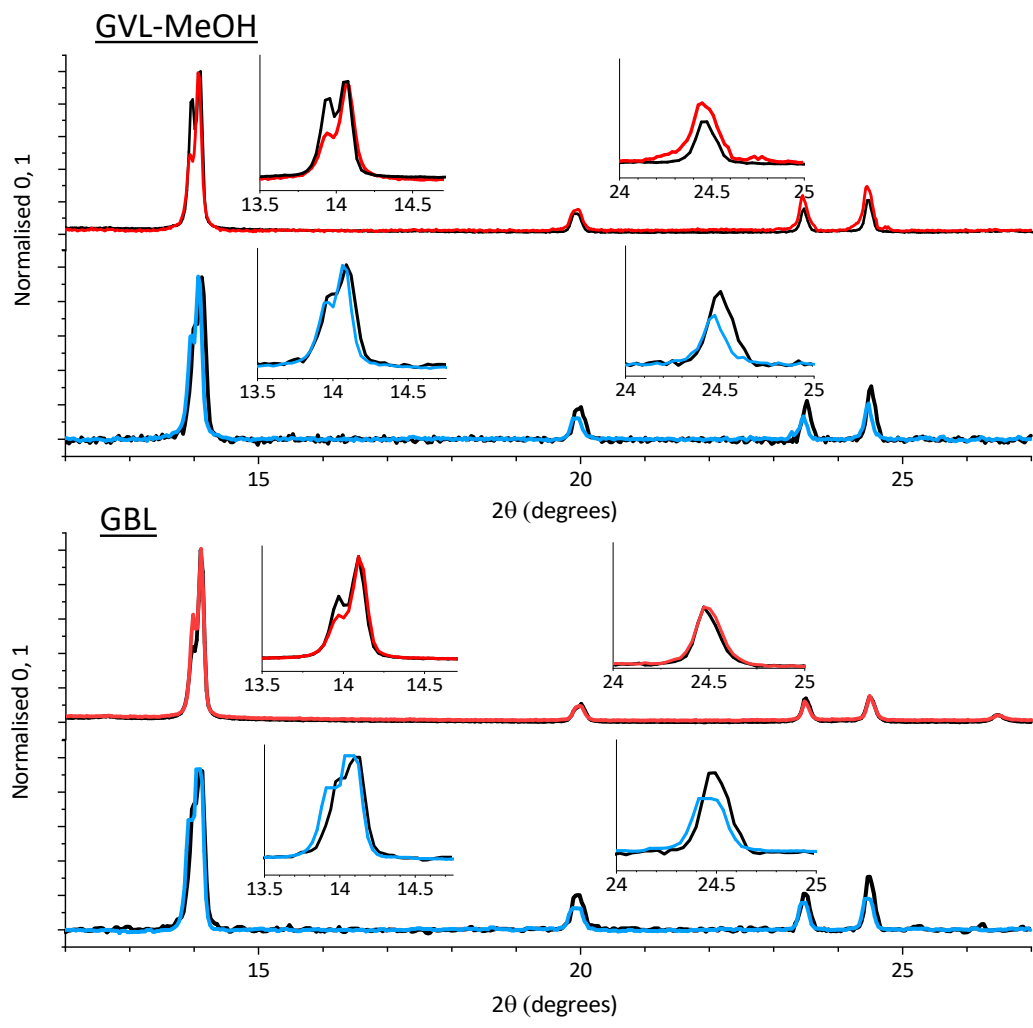

**S 2: XRD of CPSCs fabricated with GBL and GVL-MeOH perovskite after HT (blue) or dry ambient storage (red).**

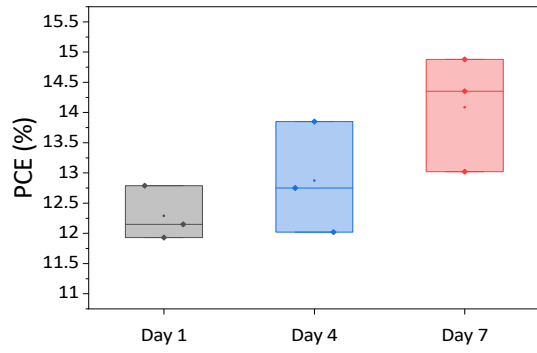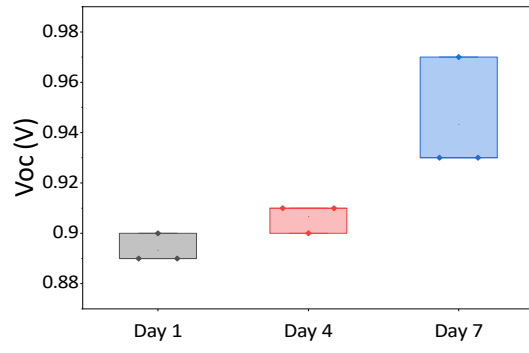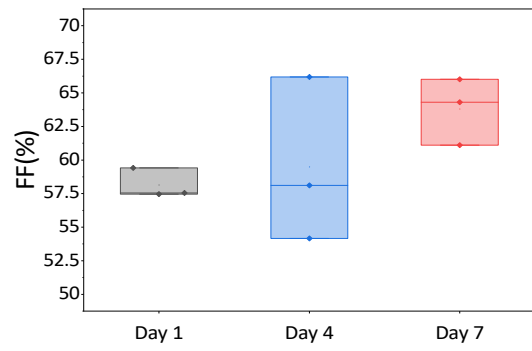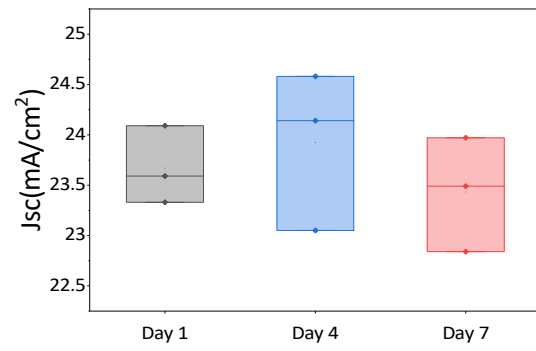

**S 3 Device data from a set measured on days 1, 4, and 7 after fabrication.**

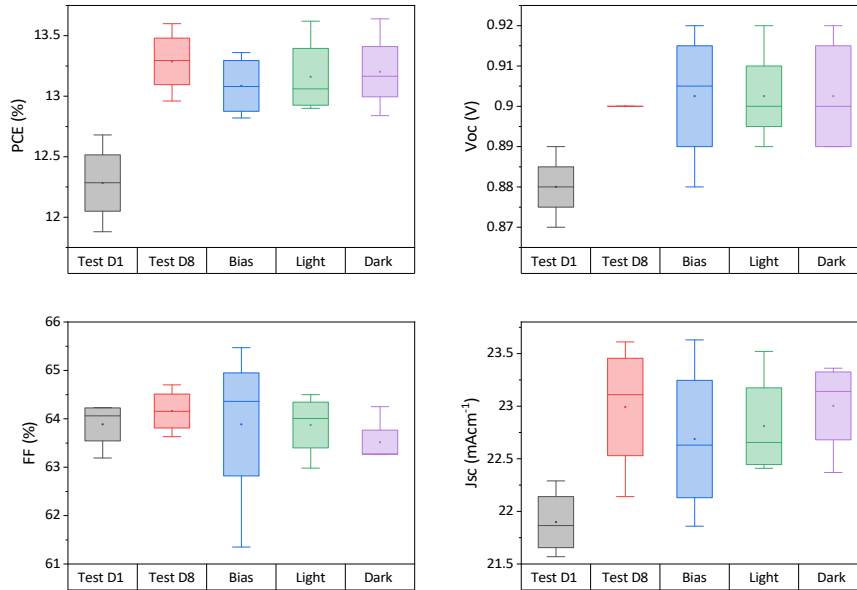

**S 4: PV parameters of GVL-MeOH AVA<sub>0.03</sub>MAPbI<sub>3</sub> devices exposed to testing (test d8), 1 sun illumination (light), bias sweeps (Bias), and dark storage (Dark). Initial performance of control devices (test d1) is provided for comparison.**

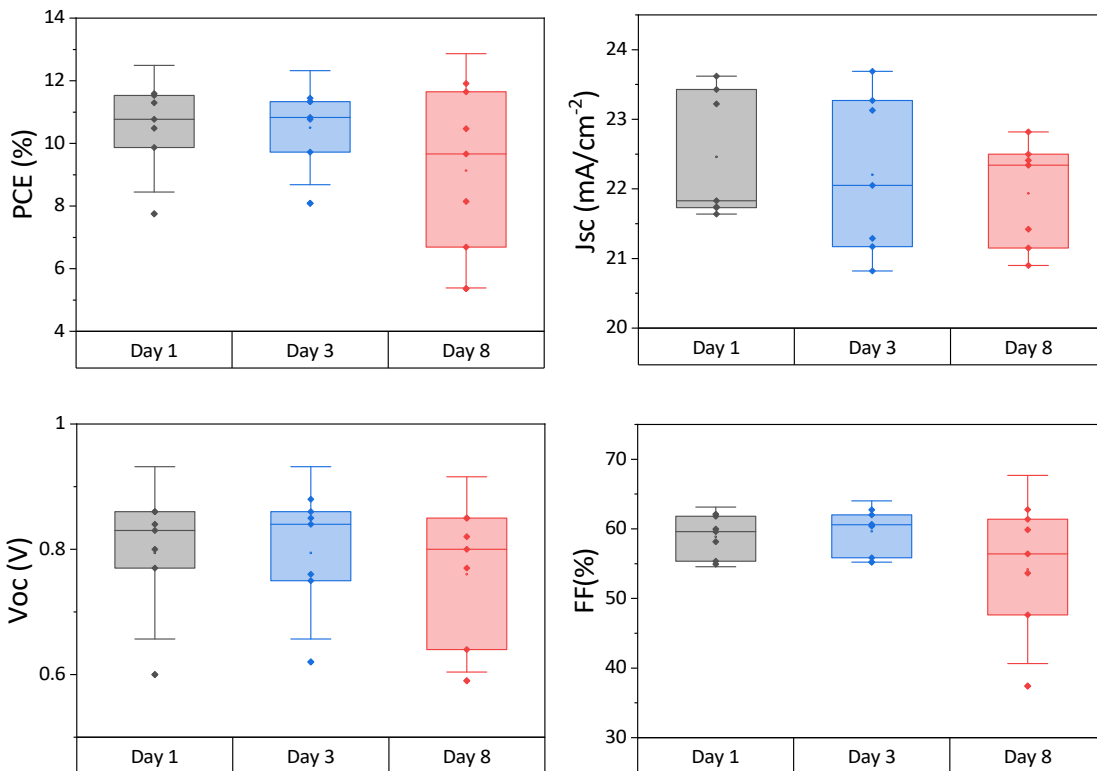

**S 5: PV parameters of GVL-MeOH AVA<sub>0.03</sub>MAPbI<sub>3</sub> devices after fabrication (Day 1), after encapsulation (day 3) and after 8 days (5 days encapsulated). Devices were encapsulated immediately after initial tests but required 24 hours for full epoxy setting before tests. 6 devices in each set.**

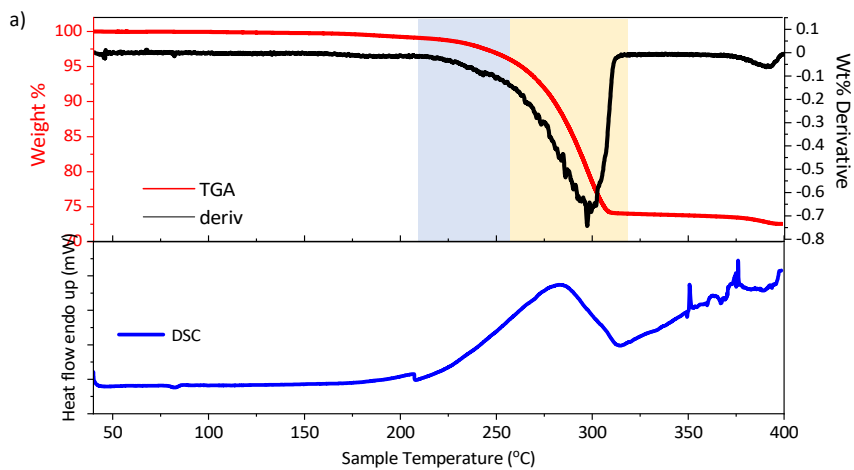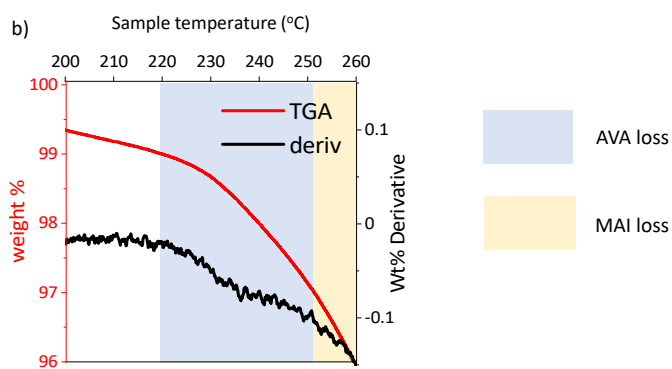

S6: a) TGA, TGA derivative and DSC of  $\text{AVA}_{0.03}\text{MAPbI}_3$  annealed on glass, between 40°C and 400°C. b) Closer look at the smaller AVAI mass loss.

**Table S 1: Performance evolution in encapsulated devices, with IV data from day 1, day 3 (post encapsulation) and day 8.**

| Day | Device | PCE   | Voc  | FF(%) | Jsc   |
|-----|--------|-------|------|-------|-------|
| 1   | b2(1)  | 11.53 | 0.86 | 61.82 | 21.73 |
| 1   | c4     | 10.48 | 0.83 | 58.17 | 21.83 |
| 1   | b1     | 11.59 | 0.86 | 62.1  | 21.74 |
| 1   | c3     | 10.77 | 0.84 | 59.59 | 21.64 |
| 1   | c2     | 11.3  | 0.8  | 59.96 | 23.62 |
| 1   | b2(2)  | 7.75  | 0.6  | 55.36 | 23.43 |
| 1   | b4     | 9.87  | 0.77 | 54.92 | 23.22 |
| 3   | b2(1)  | 11.33 | 0.88 | 62.02 | 20.82 |
| 3   | c4     | 10.83 | 0.84 | 60.62 | 21.29 |
| 3   | b1     | 11.44 | 0.86 | 62.72 | 21.17 |
| 3   | c3     | 11.33 | 0.85 | 60.39 | 22.05 |
| 3   | c2     | 10.77 | 0.76 | 60.59 | 23.27 |
| 3   | b2(2)  | 8.09  | 0.62 | 55.21 | 23.69 |
| 3   | b4     | 9.72  | 0.75 | 55.86 | 23.13 |
| 8   | b2(1)  | 11.65 | 0.85 | 61.37 | 22.34 |
| 8   | c4     | 8.15  | 0.8  | 47.64 | 21.42 |
| 8   | b1     | 11.91 | 0.85 | 62.76 | 22.41 |
| 8   | c3     | 9.66  | 0.82 | 56.42 | 20.9  |
| 8   | c2     | 10.47 | 0.77 | 59.88 | 22.82 |
| 8   | b2(2)  | 6.69  | 0.59 | 53.64 | 21.15 |
| 8   | b4     | 5.36  | 0.64 | 37.43 | 22.5  |

**Table S 2: Performance evolution in unencapsulated controls, with IV data from fresh and aged cells.**

| Scan | Day 1   |         |        |                           | Day 8   |         |        |                           |
|------|---------|---------|--------|---------------------------|---------|---------|--------|---------------------------|
|      | PCE (%) | Voc (V) | FF (%) | Jsc (mAcm <sup>-2</sup> ) | PCE (%) | Voc (V) | FF (%) | Jsc (mAcm <sup>-2</sup> ) |
| f    | 10.92   | 0.85    | 59.11  | 21.65                     | 13.18   | 0.91    | 63.45  | 22.88                     |
| f    | 10.45   | 0.85    | 53.07  | 23.2                      | 11.22   | 0.88    | 55.15  | 23.04                     |
| f    | 12.78   | 0.87    | 63.92  | 22.86                     | 13.5    | 0.9     | 63.8   | 23.46                     |
| f    | 12.18   | 0.86    | 61.63  | 22.85                     | 12.85   | 0.9     | 63.1   | 22.75                     |

**Table S3: Identified FTIR absorption peaks and the corresponding functional groups.**

|      | <b>Absorption (cm<sup>-1</sup>)</b> | <b>Features</b>        | <b>Group</b>        |
|------|-------------------------------------|------------------------|---------------------|
| i)   | 3012-2840                           | Decreasing triplet     | C-H stretch         |
| ii)  | 1762                                | Large sharp singlet    | C=O lactone stretch |
| iii) | 1466-1305                           | Many small sharp peaks | C-H bends           |
| iv)  | 1173                                | Sharp narrow peak      | C-O lactone stretch |
